# Supplementary material
Source: publisher figshare collection journal article supplement (https://sage.figshare.com/ndownloader/files/22055742)
Supplement: Supplementary file 1 [file 22055742]

**Table 1: Characteristics of included trials**

| First author         | Country  | Number of patients(n) | Cancer                            | Intervention(n)<br>Drugs or non-drugs             | Dosage   | Administration                                                                                                                                    | Placebo                | Outpatients/<br>Inpatients |
|----------------------|----------|-----------------------|-----------------------------------|---------------------------------------------------|----------|---------------------------------------------------------------------------------------------------------------------------------------------------|------------------------|----------------------------|
| 8] Bergqvist(2002)[1 | France   | 332                   | Abdominal or pelvic cancer        | enoxaparin                                        | 40 mg    | Subcutaneous enoxaparin once daily for 19 to 21 days                                                                                              | placebo                | inpatients                 |
| Cerrato(1978)[19]    | Italy    | 100                   | Brain cancer                      | Calcium heparin                                   | 5,000U   | Give calcium heparin subcutaneously 2 hours before surgery and every 8 hours thereafter for at least 7 days.                                      | no thrombo prophylaxis | inpatients                 |
| Daniel(1983)[20]     | USA      | 185                   | Gynecologic tumor                 | Sodium heparin                                    | 5,000 U  | Subcutaneously 2 hours preoperatively and every 12 hours postoperatively for the first 7 postoperative days.                                      | placebo                | Inpatients                 |
| Daniel(1984)[21]     | USA      | 194                   | Gynecologic tumor                 | Perioperative External Pneumatic Calf Compression | NA       | Calf compression continued until discharge from the recovery room or through the first 24 hr postoperatively                                      | no thrombo prophylaxis | inpatients                 |
| Gondret(1995)[22]    | France   | 40                    | Head and neck cancer              | enoxaparin                                        | 0.2 ml   | once a day, for 8 days after the operation                                                                                                        | placebo                | inpatients                 |
| Kakkar(2010)[23]     | Italy    | 625                   | Abdominal or pelvic cancer        | bemiparin                                         | 0.2 ml   | Subcutaneous injections of bemiparin sodium for 20 ± 2 additional days.                                                                           | placebo                | inpatients                 |
| Negm(2017)[24]       | Egypt    | 40                    | Hepatocellular carcinoma          | LMWH enoxheparin                                  | 1 IU/kg  | Twice daily for 2 weeks from the first day of TACE                                                                                                | no thrombo prophylaxis | inpatients                 |
| Perry(2010)[11]      | Canada   | 186                   | Malignant glioma                  | LMWH dalteparin                                   | 5,000 IU | Subcutaneously once daily                                                                                                                         | placebo                | inpatients                 |
| Shukla(2008)[25]     | India    | 99                    | Colorectal cancer                 | dalteparin sodium                                 | 2,500 IU | Subcutaneously about 2 hours before surgery, followed by 2500 IU daily subcutaneously in the morning the prophylaxis was continued until day 6±1. | no thrombo prophylaxis | inpatients                 |
| Srikuea(2017)[26]    | Thailand | 108                   | Gynecologic and urological cancer | eoxaparin                                         | 0.4 ml   | Started after drain removal until 4 weeks postoperatively                                                                                         | no thrombo prophylaxis | outpatients                |
| Turpie(1977)[27]     | Canada   | 128                   | Brain cancer                      | Pneumatic compression                             | NA       | Intermittent calf compression was started during the immediate postoperative period and was continued for a maximum of 5 days                     | no thrombo prophylaxis | inpatients                 |

|    |                   |                                                         |      |                                                                                                                     |                          |                                                                                          |                                                                                                                                                                                                                  |                             |                     |
|----|-------------------|---------------------------------------------------------|------|---------------------------------------------------------------------------------------------------------------------|--------------------------|------------------------------------------------------------------------------------------|------------------------------------------------------------------------------------------------------------------------------------------------------------------------------------------------------------------|-----------------------------|---------------------|
| 8] | Abdelkefi(2004)[2 | Tunisia                                                 | 108  | Haematological malignancies                                                                                         | Unfractionated heparin   | 100IU/kg /d                                                                              | continuous infusion of 100 IU/kg/daily, with a maximal dose of UFH 10000 IU daily                                                                                                                                | no thromboprophylaxis       | inpatients          |
|    | Agnelli(2009)[29] | Italy                                                   | 1150 | metastatic or locally advanced solid cancer                                                                         | Nadroparin               | 3800 IU                                                                                  | receive subcutaneous injections of nadroparin once a day. Study treatment was started on the same day as chemotherapy, and was given for the duration of chemotherapy or up to a maximum of 120 days (±10 days). | placebo                     | ambulatory patients |
| 3] | Agnelli(2012)[30] |                                                         | 3212 | cancer of the lung, pancreas, stomach, colon or rectum, bladder, or ovary.                                          | subcutaneous semuloparin | 20 mg                                                                                    | 20 mg once daily, or placebo until there was a change of chemotherapy regimen                                                                                                                                    | placebo                     | inpatients          |
|    | Bern (1990)[31]   | England                                                 | 87   | Colon, Breast, et al                                                                                                | warfarin                 | 1 mg                                                                                     | Warfarin therapy was continued at this dose for 90 days or until there was venogram evidence of thrombosis.                                                                                                      | placebo                     | inpatients          |
|    | Boraks(1998)[32]  | UK                                                      | 223  | Haematological malignancies                                                                                         | Warfarin                 | 1mg/d                                                                                    | From the time of line insertion until removal                                                                                                                                                                    | no thromboprophylaxis       | inpatients          |
|    | Doormaal(2011)[3  | Italy                                                   | 498  | hormone-refractory prostate cancer, non-small-cell lung cancer [NSCLC] IIIB, and locally advanced pancreatic cancer | nadroparin               | 50 kg, 3,800 IU twice daily; 50-70 kg, 11,400 IU once daily; 70 kg, 15,200 IU once daily | followed by half-therapeutic doses for an additional 4 weeks (50 kg, 3,800 IU once daily; 50-70 kg, 5,700 IU once daily; 70 kg, 7,600 IU once daily)                                                             | no thromboprophylaxis group | inpatients          |
|    | Ek(2017)[34]      | Canada, Sweden , Denmark                                | 377  | SCLC                                                                                                                | enoxaparin               | 1 mg/kg                                                                                  | The study drug was started on day 1 of chemotherapy and continued until the 21st day of the last chemotherapy cycle.                                                                                             | No thromboprophylaxis group | inpatients          |
|    | Haas(2012)[35]    | Germany, Czech Republic, Ukraine, Romania, and Belarus. | 898  | Metastatic Breast Cancer or Stage III/IV Lung Cancer                                                                | certoparin               | 3000 IU                                                                                  | once daily for 6 months                                                                                                                                                                                          | placebo                     | inpatients          |

|                     |             |     |                                                                                                                                             |                              |                        |                                                                                                                                           |                                                                                                                                           |             |
|---------------------|-------------|-----|---------------------------------------------------------------------------------------------------------------------------------------------|------------------------------|------------------------|-------------------------------------------------------------------------------------------------------------------------------------------|-------------------------------------------------------------------------------------------------------------------------------------------|-------------|
| Heaton(2002)[36]    | New Zealand | 88  | Haematological malignancies                                                                                                                 | Warfarin                     | NA                     | receive either a daily minidose of warfarin                                                                                               | no anticoagulation                                                                                                                        | inpatients  |
| Kakkar(2004)[37]    | UK          | 385 | Advanced Cancer                                                                                                                             | Dalteparin                   | 5,000 IU               | receive subcutaneous injections of dalteparin                                                                                             | placebo                                                                                                                                   | inpatients  |
| Karthaus(2006)[38]  | Germany     | 439 | Cancer                                                                                                                                      | Dalteparin                   | 5,000 IU               | within 5–7 days of catheter placement, to receive dalteparin injected subcutaneously once daily.                                          | placebo                                                                                                                                   | inpatients  |
|                     |             |     |                                                                                                                                             |                              |                        | daily for 6 weeks while placebo patients took an identical inert tablet daily                                                             | Placebo                                                                                                                                   | inpatients? |
| Levine(1994)[39]    | Canada      | 311 | breast cancer                                                                                                                               | very-low-dose warfarin       | 1 mg                   |                                                                                                                                           |                                                                                                                                           |             |
| Levine(2012)[40]    | Canada, USA | 125 | advanced metastatic breast, gastrointestinal, bladder, ovarian or prostate cancers, cancer of unknown origin, myeloma or selected lymphomas | or Apixaban                  | 5 mg, 10 mg or 20 mg   | once daily of apixaban                                                                                                                    | placebo                                                                                                                                   | inpatients  |
| Maraveyas(2010)[43] | UK          | 123 | advanced metastatic pancreatic cancer                                                                                                       | or Gemcitabine               | 1000 mg/m <sup>2</sup> | gemcitabine 1000 mg/m <sup>2</sup> (Burris schedule) for 3 months stratified by extent of disease (LA vs. M), and KPS (90–100 vs. 80–60). | no thromboprophylaxis                                                                                                                     | inpatients  |
| Maraveyas(2012)[42] | UK          | 121 | pancreatic adenocarcinoma                                                                                                                   | Dalteparin                   | 200 IU/kg              | once subcutaneously for 4 weeks followed by a stepdown to 150 IU/kg for a further 8 weeks                                                 | Gemcitabine was given on a conventional schedule as described by Burris et al. <sup>11</sup> Response assessment was planned for week 12. | inpatients  |
| Monreal (1996) [41] | Spain       | 29  | cancer                                                                                                                                      | low molecular weight heparin | 2500IU sc              | once a daily, starting 2h before insertion of the catheter                                                                                | no thromboprophylaxis                                                                                                                     | inpatients  |

|                      |             |     |                            |               |          |                                                                                                                                                                                                                                                 |                        |             |
|----------------------|-------------|-----|----------------------------|---------------|----------|-------------------------------------------------------------------------------------------------------------------------------------------------------------------------------------------------------------------------------------------------|------------------------|-------------|
| Niers(2007)[44]      | Netherlands | 113 | Hematologic malignancies   | LMWH anti-FXa | 2850 U   | started 2 h before insertion of the CVC, and was continued for 3 weeks or until the day of CVC removal                                                                                                                                          | placebo                | inpatients  |
| Pelzer(2015)[45]     | Germany     | 312 | Advanced pancreatic cancer | enoxaparin    | 1 mg/kg  | once subcutaneously daily                                                                                                                                                                                                                       | observati on group     | Outpatients |
| Young(2009)[46]      | UK          | 812 | cancer                     | Warfarin      | 1 mg/d   | From 3 days before CVC insertion. Patients took oral warfarin every day until thrombosis occurred or the catheter had to be removed for any reason and patients were able to temporarily discontinue treatment in the event of thrombocytopenia | no thrombo prophylaxis | N/A         |
| Khorana(2017)[47]    | USA         | 98  | Malignancy cancer          | Dalteparin    | 500units | 5000 units subcutaneously daily or observation for a period of 12weeks                                                                                                                                                                          | observati on group     | inpatients  |
| Verso(2005)[48]      | Italy       | 385 | cancer                     | Enoxaparin    | 40 mg    | the dose of 40 mg once daily                                                                                                                                                                                                                    | Placebo                | inpatients  |
| Lecumberri(2013)[49] | Spain       | 38  | cancer                     | Bemiparin     | 3500IU   | The same first line therapy + bemiparin 3,500 IU subcutaneous daily for 26 weeks (or until disease progression, whatever appeared first), starting the first day of chemotherapy                                                                | Chemora diothera py    | inpatients  |

N/A: not available.
